# Supplementary material for: Antifungal Effect of Brassica Tissues on the Mycotoxigenic Cereal Pathogen Fusarium graminearum
Source: MDPI journal article supplement (doi:10.3390/antibiotics11091249), 2022-09-15
Supplement: s1 [file s1]

**Supplementary Table S1.** Mycelial colony growth (mm) of *Fusarium graminearum* FG2502 in Petri dishes after 5 days untreated and exposed to 1, 2, 4, 8 leaf discs collected at three growth stages of *Brassica juncea* 'Brons', *Raphanus sativus* 'Bokito' and *Eruca sativa* 'Trio' in leaf disc assay (first experiment)

| Treatments                       | No. of leaf discs | Early-leaf stage                                                | Stem-extension stage | Early-bud stage |
|----------------------------------|-------------------|-----------------------------------------------------------------|----------------------|-----------------|
|                                  |                   | Mean mycelial colony growth (mm) of <i>Fusarium graminearum</i> |                      |                 |
| Untreated                        | 0                 | 75                                                              | 75                   | 75              |
| <i>Brassica juncea</i> 'Brons'   | 1                 | 77                                                              | 76                   | 37              |
|                                  | 2                 | 73                                                              | 68                   | 33              |
|                                  | 4                 | 76                                                              | 51                   | 19              |
|                                  | 8                 | 48                                                              | 8                    | 0               |
| <i>Raphanus sativus</i> 'Bokito' | 1                 | 74                                                              | 75                   | 75              |
|                                  | 2                 | 76                                                              | 76                   | 75              |
|                                  | 4                 | 77                                                              | 76                   | 76              |
|                                  | 8                 | 77                                                              | 75                   | 76              |
| <i>Eruca sativa</i> 'Trio'       | 1                 | 74                                                              | 75                   | 74              |
|                                  | 2                 | 77                                                              | 75                   | 75              |
|                                  | 4                 | 77                                                              | 76                   | 76              |
|                                  | 8                 | 76                                                              | 76                   | 76              |

**Supplementary Table S2.** Percentage incidence of *Fusarium graminearum* FG2502 recovered in inoculum (mean values) incubated for 8 weeks in jars filled with chopped brassica shoots and soil in closed jar assay (first experiment)

| Treatments                       | % incidence <i>Fusarium graminearum</i> recovered in inoculum |
|----------------------------------|---------------------------------------------------------------|
| Untreated                        | 100                                                           |
| <i>Brassica juncea</i> 'Brons'   | 56                                                            |
| <i>Raphanus sativus</i> 'Bokito' | 52                                                            |
| <i>Eruca sativa</i> 'Trio'       | 33                                                            |
